# Supplementary material for: The Performance of Different AgTiO2 Loading into Poly(3-Nitrothiophene) for Efficient Adsorption of Hazardous Brilliant Green and Crystal Violet Dyes
Source: Hindawi journal article supplement (doi:10.1155/2022/4691347), 2022-01-05
Supplement: f1 [file 4691347.f1.pdf]

## **Electronic Supplemental Files (ESF)**

### **The performance of different AgTiO<sub>2</sub> loading into poly(3-nitrothiophene) for efficient adsorption of hazardous Brilliant Green and Crystal Violet dyes**

Sara A. Alqarni<sup>1\*</sup>

<sup>1</sup>Department of Chemistry, College of Science, University of Jeddah,  
Jeddah, Saudi Arabia

**Keywords:** Poly(3-nitrothiophene); AgTiO<sub>2</sub>; Nanocomposites; Brilliant Green dye; Crystal Violet; Adsorption.

---

\* **Corresponding author:** Sara A. Alqarni (sasalqarni@uj.edu.sa; sara.science.college@gmail.com)

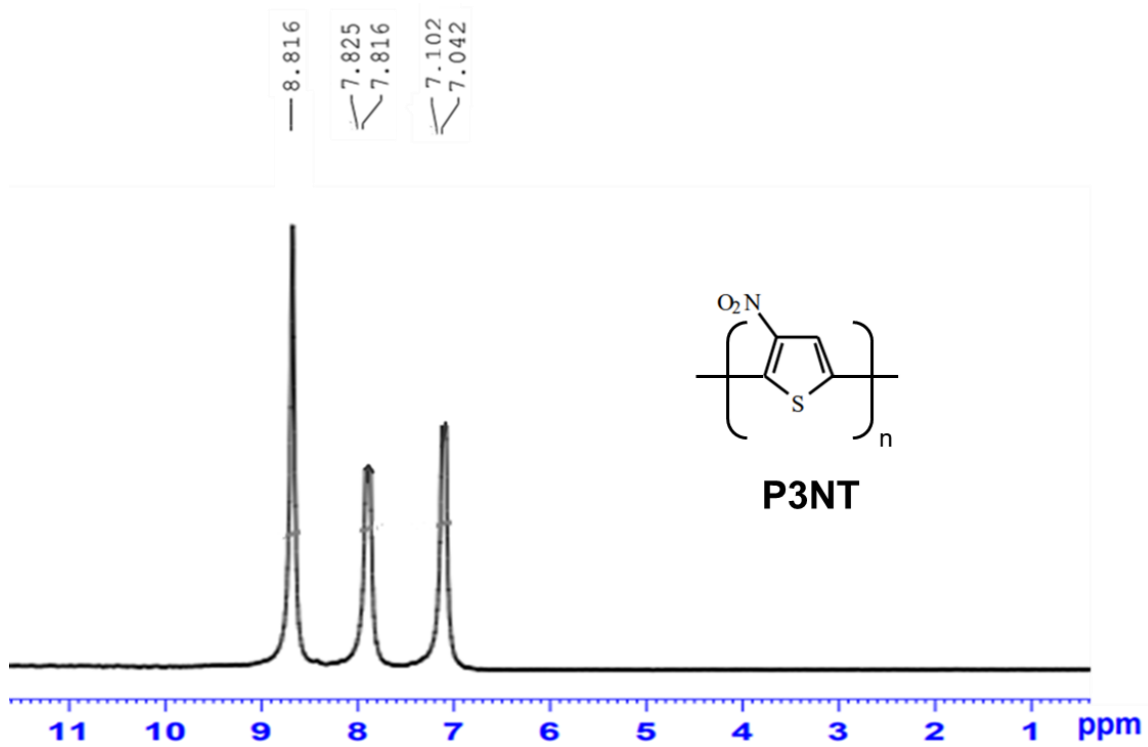

Figure S1. <sup>1</sup>H-NMR spectrum of P3NT.
